# Supplementary material for: Selective hydrogenation via precise hydrogen bond interactions on catalytic scaffolds
Source: PubMed Central journal article supplement (PMC9879947; doi:10.1038/s41467-023-36015-z), 2023-01-26
Supplement: 41467_2023_36015_MOESM1_ESM.pdf [file 41467_2023_36015_MOESM1_ESM.pdf]

## Supplementary Information

### Selective hydrogenation via precise hydrogen bond interactions on catalytic scaffolds

Song Shi<sup>1,2§</sup>, Piaoping Yang<sup>1§</sup>, Chaochao Dun<sup>3</sup>, Weiqing Zheng<sup>1</sup>, Jeffrey J. Urban<sup>3</sup>, Dionisios G. Vlachos<sup>1\*</sup>

<sup>1</sup> Department of Chemical and Biomolecular Engineering and Catalysis Center for Energy Innovation (CCEI), University of Delaware, Newark, DE 19716, USA.

<sup>2</sup> State Key Laboratory of Catalysis, Dalian Institute of Chemical Physics, Chinese Academy of Sciences, Dalian 116023, People's Republic of China.

<sup>3</sup> The Molecular Foundry, Lawrence Berkeley National Laboratory Berkeley, CA 94720(USA)

<sup>§</sup> These authors contributed equally.

✉ email: vlachos@udel.edu

#### Table of contents

|                                                                                                                 |    |
|-----------------------------------------------------------------------------------------------------------------|----|
| Figure S1. Wettability difference of support with different functional groups. ....                             | 3  |
| Figure S2. Pore structure comparison of different catalytic materials. ....                                     | 4  |
| Figure S3. Ir particle size. ....                                                                               | 5  |
| Figure S4. Crystallinity of supports. ....                                                                      | 6  |
| Figure S5. Thermal stability of the two catalysts. ....                                                         | 7  |
| Figure S6. Kinetics and conditions for optimizing the reaction. ....                                            | 8  |
| Figure S7. Reaction of 2-methylfuran. ....                                                                      | 9  |
| Figure S8. Electronic state of Ir over different supports via XPS. ....                                         | 10 |
| Figure S9. Electronic state of Ir over different supports via CO adsorption. ....                               | 11 |
| Figure S10. Microscopy characterization of Pd and Pt catalyst. ....                                             | 12 |
| Figure S11. XPS spectra of the Pd and Pt catalysts, ....                                                        | 13 |
| Figure S12. Adsorption isotherm of furfural on different supports. ....                                         | 14 |
| Figure S13. Adsorption of toluene on HCP-OH and HCP-CH <sub>3</sub> . ....                                      | 15 |
| Figure S14. Interaction of furfural with different supports, using <i>in situ</i> Drifts IR adsorption<br>..... | 16 |
| Figure S15. Interaction of furfural with HCP-CH <sub>3</sub> via <i>in situ</i> Drifts-IR TPD experiments. ...  | 17 |
| Figure S16. Interaction of furfural with HCP-OH, using <i>in situ</i> Drifts-IR TPD experiments.<br>.....       | 18 |
| Figure S17. Interaction of furfural with different supports, using ATR-IR adsorption. ....                      | 19 |
| Figure S18. Hydrogen bond measurement between furfural and phenol. ....                                         | 20 |
| Figure S19. Hydrogen bond measurement between 2-MF and phenol. ....                                             | 21 |
| Figure S20. Computational models. ....                                                                          | 22 |
| Figure S21. Optimized configurations of furfural adsorption .....                                               | 23 |
| Figure S22. Optimized configurations of the interaction between furfural and monomers. ...                      | 24 |
| Figure S23. Particle size. ....                                                                                 | 27 |
| Figure S24. Ir particles after reaction. ....                                                                   | 28 |
| Figure S25. Catalyst reusability of Ir-HCP-OH. ....                                                             | 28 |
| Figure S26. Hot filter experiment of furfural hydrogen with Ir-HCP-OH. ....                                     | 29 |

|                                                                                                                                                          |    |
|----------------------------------------------------------------------------------------------------------------------------------------------------------|----|
| <b>Figure S27. Ketone adsorption difference over different zeolites.</b> .....                                                                           | 30 |
| <b>Figure S28. Surface hydroxy difference of Si-Beta and Si-ZSM-5.</b> .....                                                                             | 31 |
| <b>Figure S29. Reaction networks for the reactions depicted in figures 2a, 2c, and 2d.</b> .....                                                         | 32 |
| <b>Table S1.</b> Textural properties of HCP, Ir-HCP, Si-Beta, and ZSM-5. ....                                                                            | 33 |
| <b>Table S2.</b> Adsorption area of cyclopentanone, cyclohexanone, and cycloheptanone on Si-Beta and Si-ZSM-5. ....                                      | 33 |
| <b>Table S3.</b> Adsorption energies ( $E_{\text{ads}}$ ) of furfural over OH group and $\text{CH}_3$ group on the zigzag model and armchair model. .... | 34 |
| <b>Table S4.</b> Comparison of recent works on furfural hydrogenation modulation. ....                                                                   | 34 |
| <b>Supplementary Note 1</b> .....                                                                                                                        | 35 |

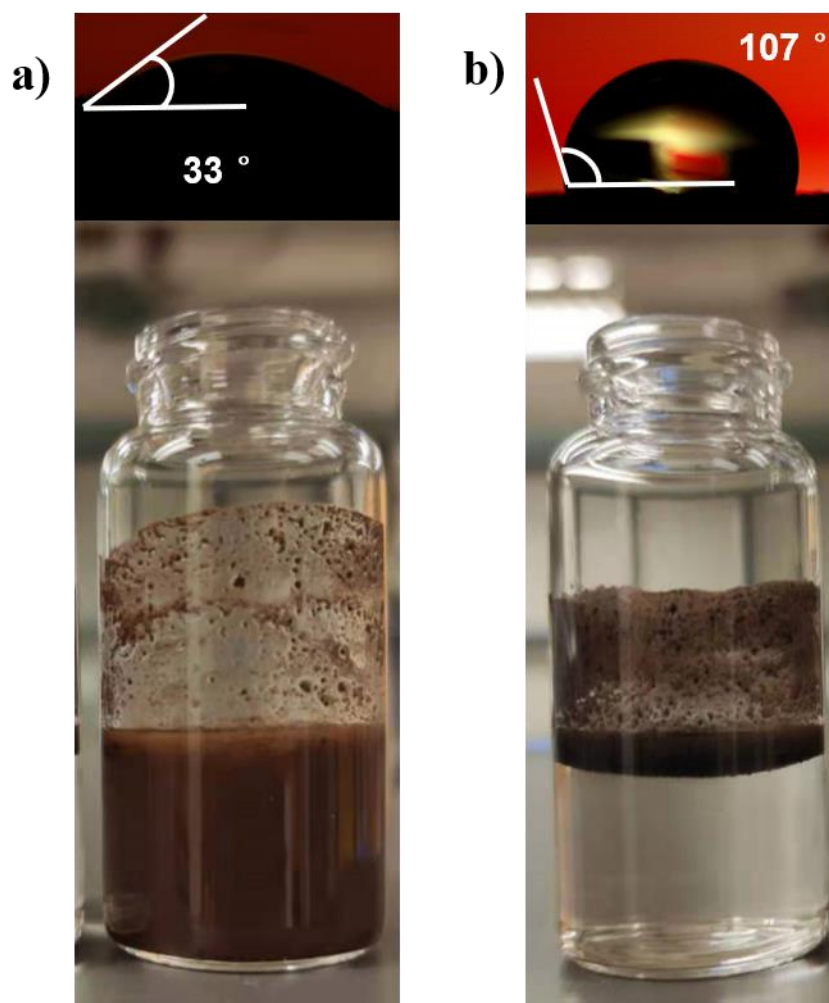

**Figure S1. Wettability difference of support with different functional groups. HCP distribution difference on water and water contact angles. a) HCP-OH, b) HCP-CH<sub>3</sub>.**

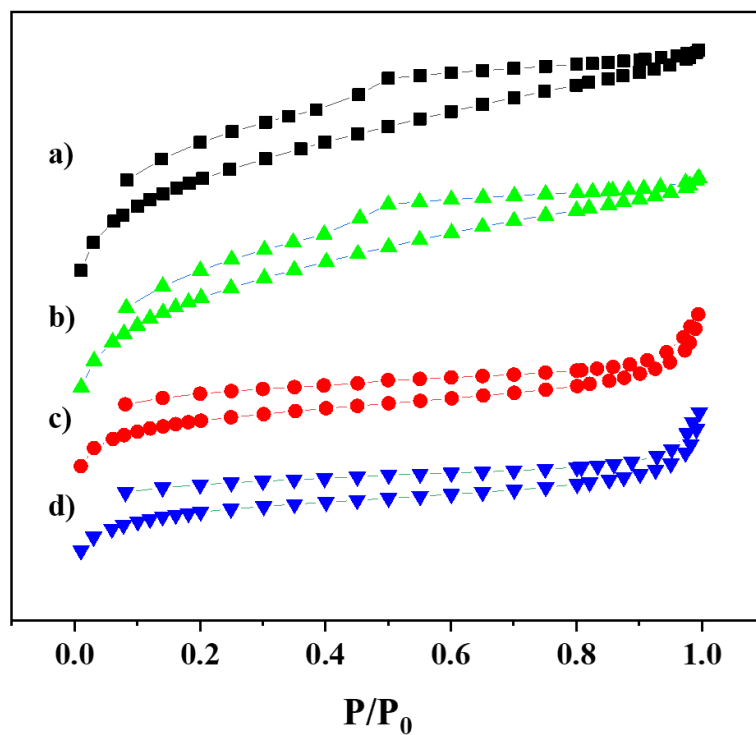

**Figure S2. Pore structure comparison of different catalytic materials.**

N<sub>2</sub> adsorption-desorption isotherms at 77 K. a) Ir-HCP-OH, b) HCP-OH,

c) Ir-HCP-CH<sub>3</sub>, d) HCP-CH<sub>3</sub>.

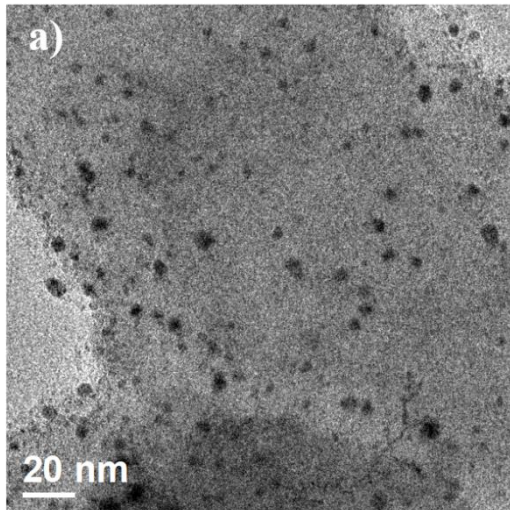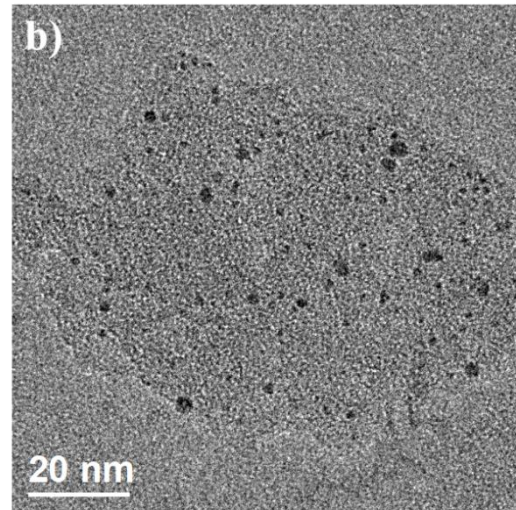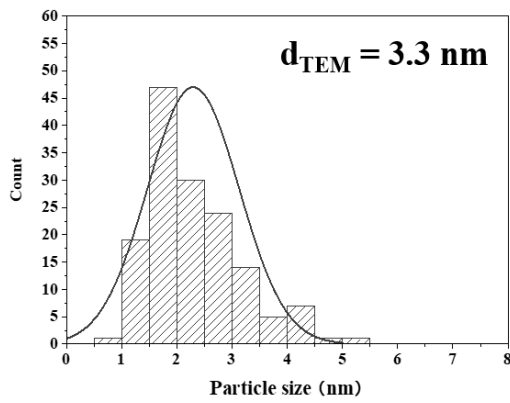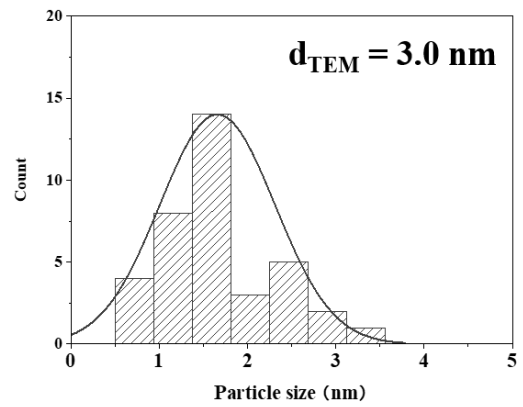

$$d_{\text{TEM}} = \frac{\sum n_i d_i^3}{\sum n_i d_i^2} \quad \text{equation S1}$$

**Figure S3. Ir particle size.** TEM images and particle size distribution of  
 a) Ir-HCP-OH and b) Ir-HCP-CH<sub>3</sub>.

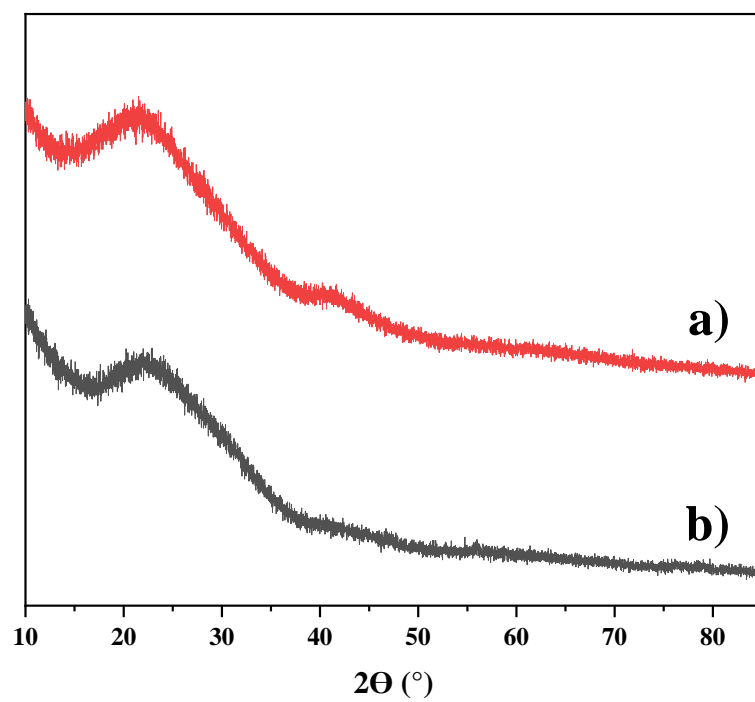

**Figure S4. Crystallinity of supports.** XRD patterns of a) HCP-CH<sub>3</sub> and b) HCP-OH.

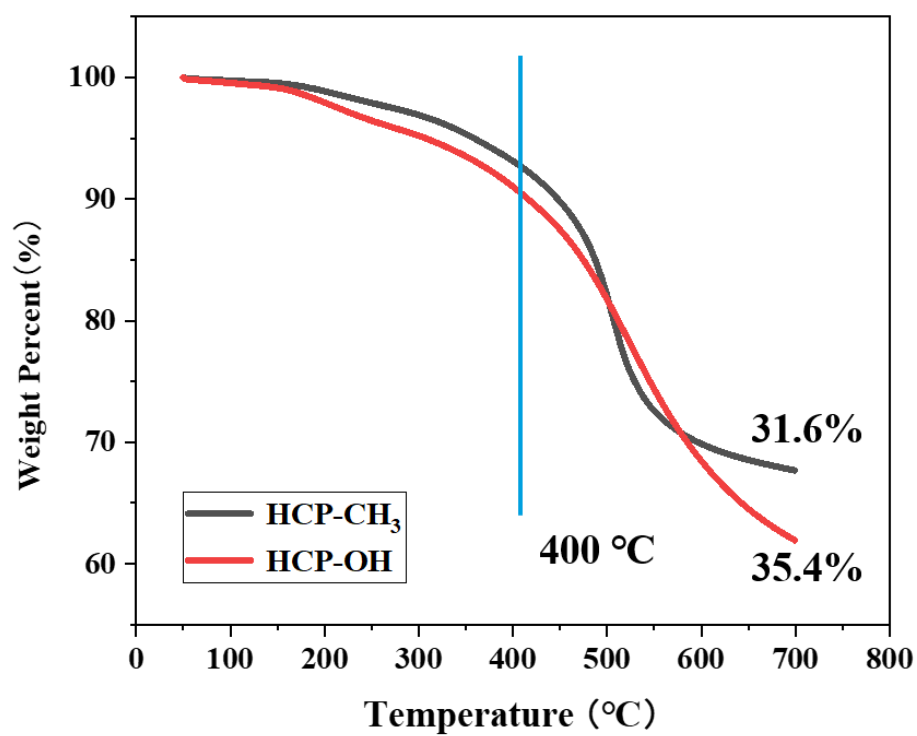

**Figure S5. Thermal stability of the two catalysts.** TGA curves of HCP-OH and HCP-CH<sub>3</sub>.

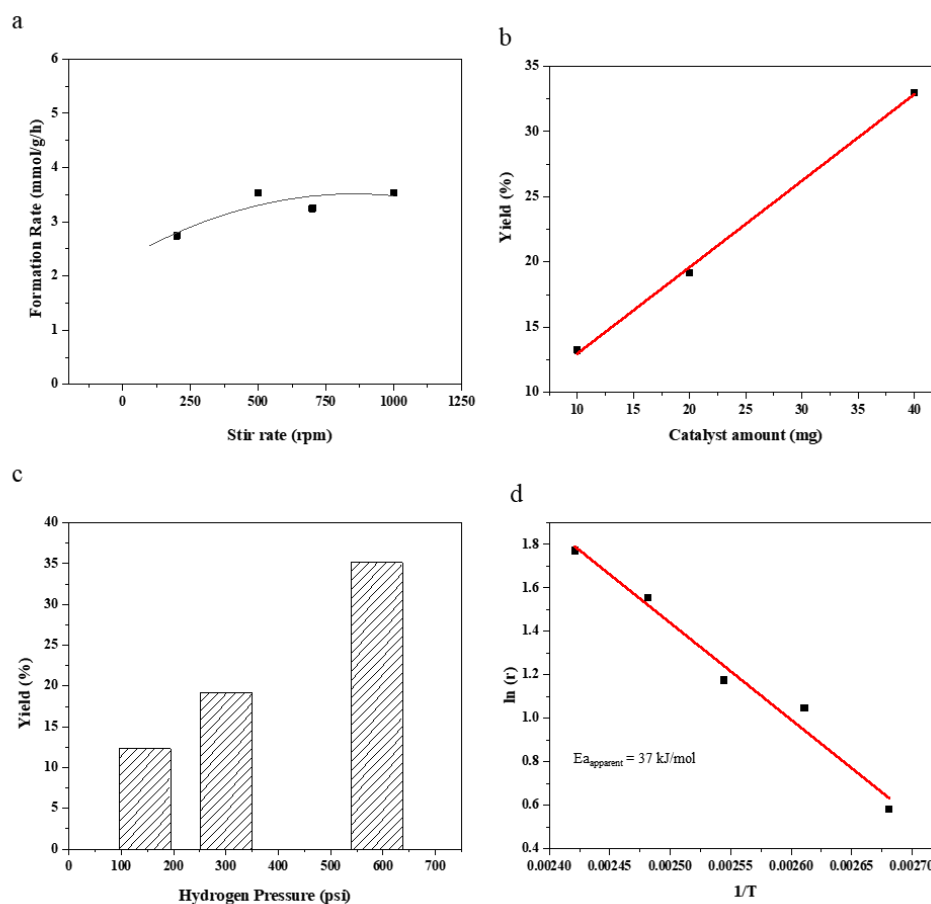

**Figure S6. Kinetics and conditions for optimizing the reaction.** a), Stir rate effect on rate with Ir-HCP-OH, b), catalyst amount effect with Ir-HCP-OH, c), hydrogen pressure effect with Ir-HCP-OH, d), Arrhenius plot of Ir-HCP-OH in furfural hydrogenation.



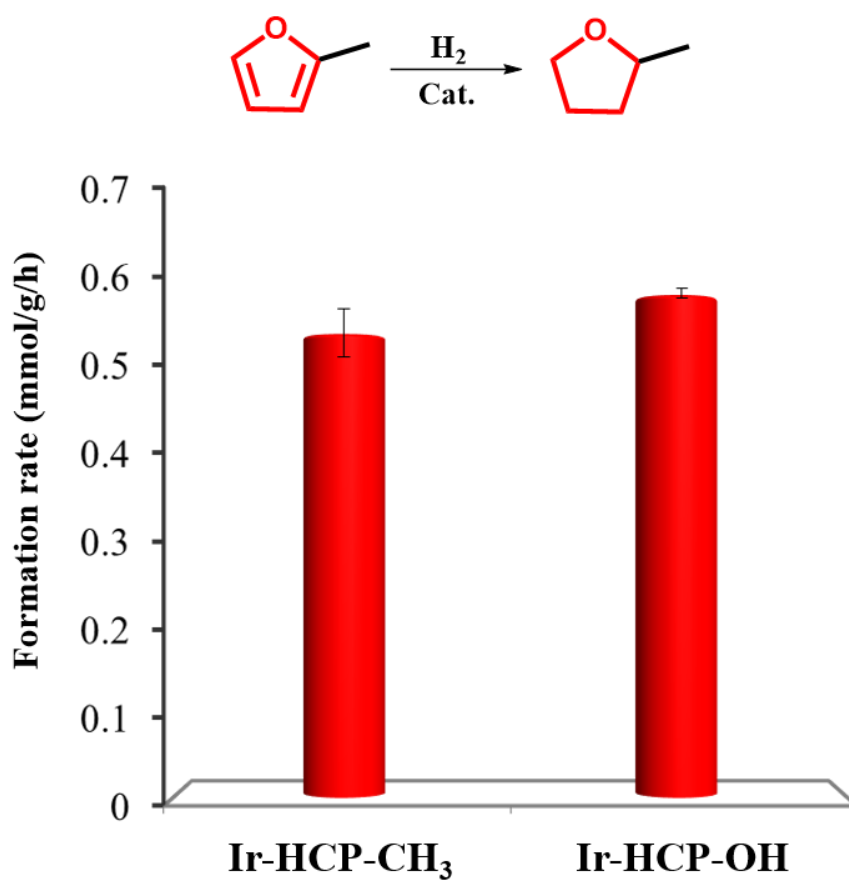

**Figure S7. Reaction of 2-methylfuran.** Hydrogenation rate over Ir-HCP-CH<sub>3</sub> and Ir-HCP-OH. Reaction conditions: substrate, 1 mmol; catalyst, 40 mg; hexane, 10 mL; H<sub>2</sub>, 300 psi; 120 °C.

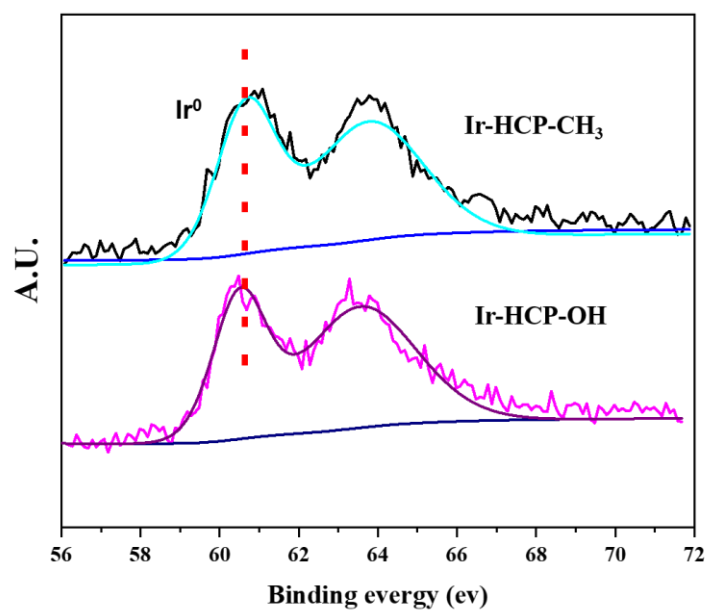

**Figure S8. Electronic state of Ir over different supports via XPS. Ir 4f**  
of Ir-HCP-CH<sub>3</sub> and Ir-HCP-OH.

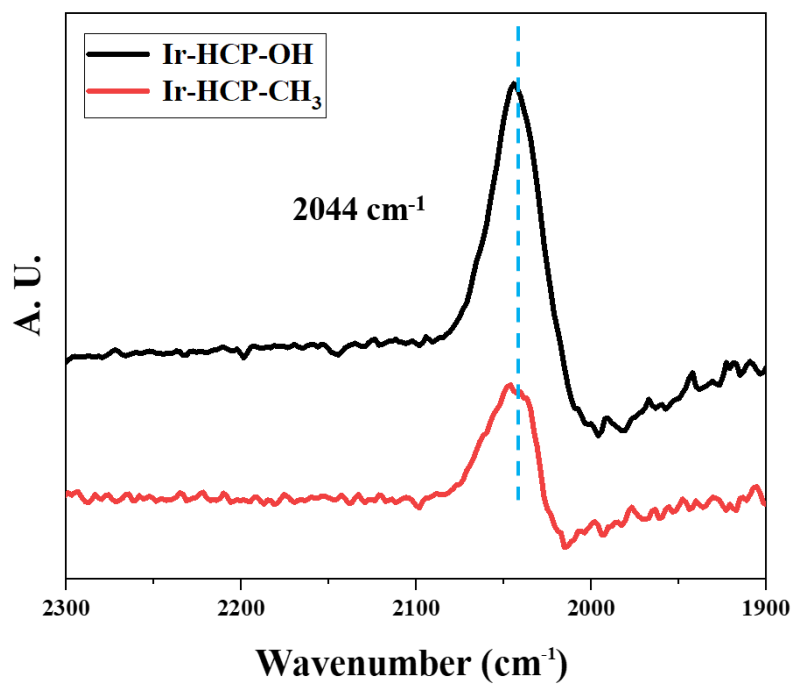

**Figure S9. Electronic state of Ir over different supports via CO adsorption.** *In situ* CO adsorption Drifts-IR peaks over Ir-HCP-CH<sub>3</sub> and Ir-HCP-OH.

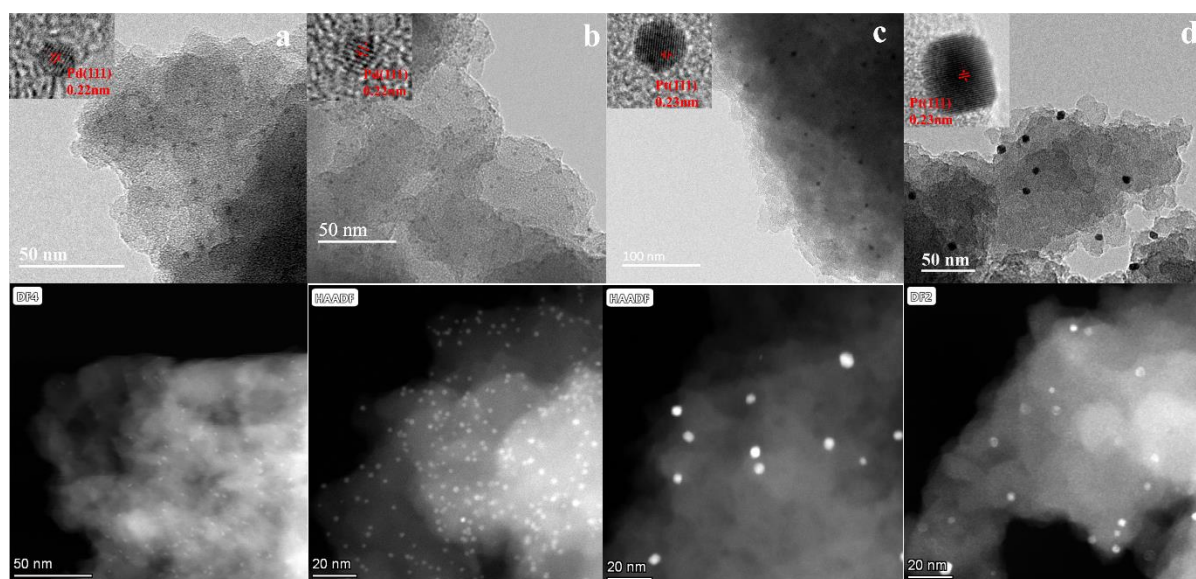

**Figure S10. Microscopy characterization of Pd and Pt catalyst.** TEM, HR-TEM and HAADF of a, Pd-HCP-CH<sub>3</sub>, b, Pd-HCP-OH, c, Pt-HCP-CH<sub>3</sub>, d, Pt-HCP-OH.

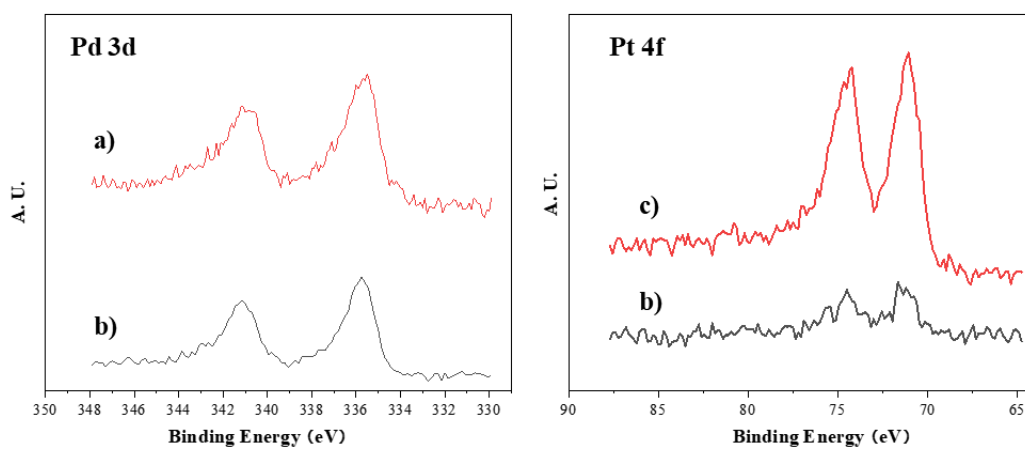

**Figure S11.** XPS spectra of the Pd and Pt catalysts, a) Pd-HCP-CH<sub>3</sub>, b) Pd-HCP-OH, c) Pt-HCP-CH<sub>3</sub>, and d) Pt-HCP-OH.

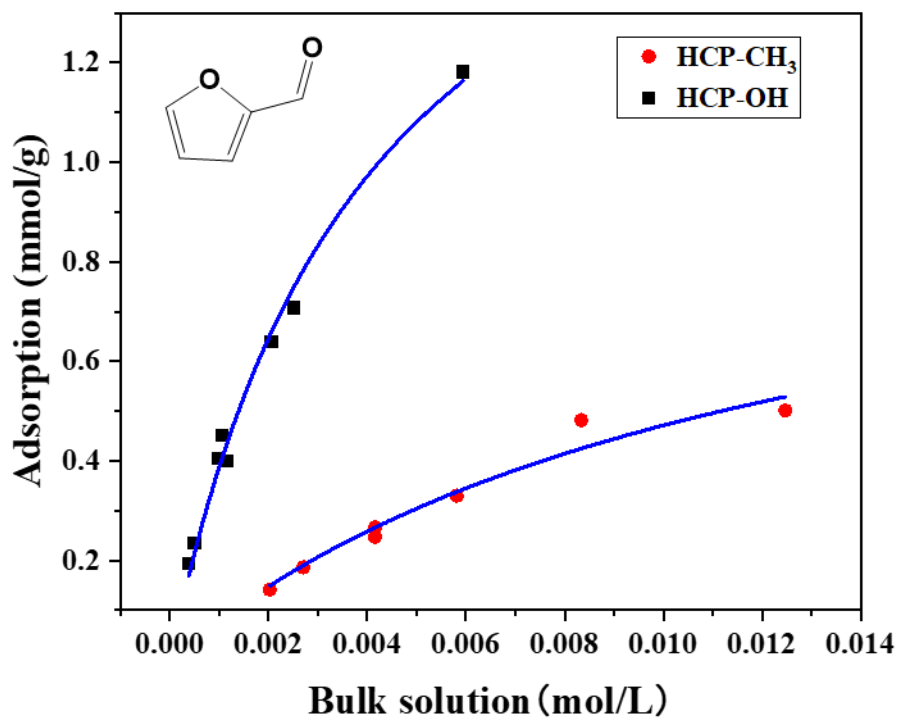

| Furfural            | Q <sub>max</sub> (mmol/g) | K        |
|---------------------|---------------------------|----------|
| HCP-OH              | 1.95 ± 0.15               | 247 ± 32 |
| HCP-CH <sub>3</sub> | 1.05 ± 0.19               | 82 ± 24  |

**Figure S12. Adsorption isotherm of furfural on different supports.**

Results on HCP-OH and HCP-CH<sub>3</sub>. Q<sub>max</sub> and K are the saturated adsorption amount and affinity constant based on a Langmuir fit.

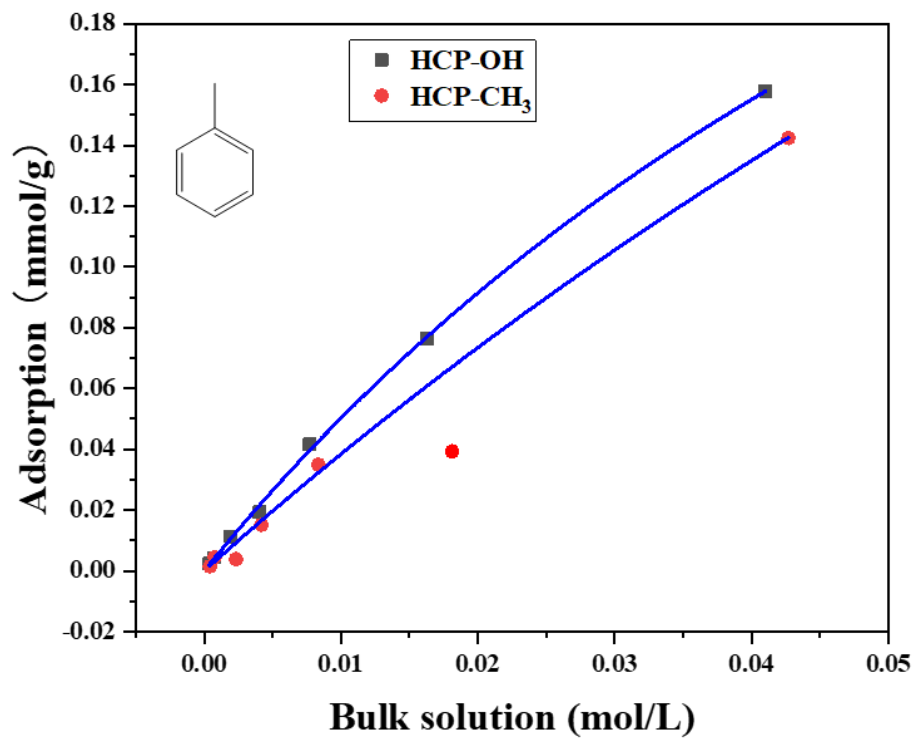

| Toluene             | Q <sub>max</sub> (mmol/g) | K      |
|---------------------|---------------------------|--------|
| HCP-OH              | 0.51±0.04                 | 10.9±1 |
| HCP-CH <sub>3</sub> | 0.83±0.44                 | 4.9±3  |

**Figure S13. Adsorption of toluene on HCP-OH and HCP-CH<sub>3</sub>.** Q<sub>max</sub> and K are the saturated adsorption amount and affinity constant based on a Langmuir fit.

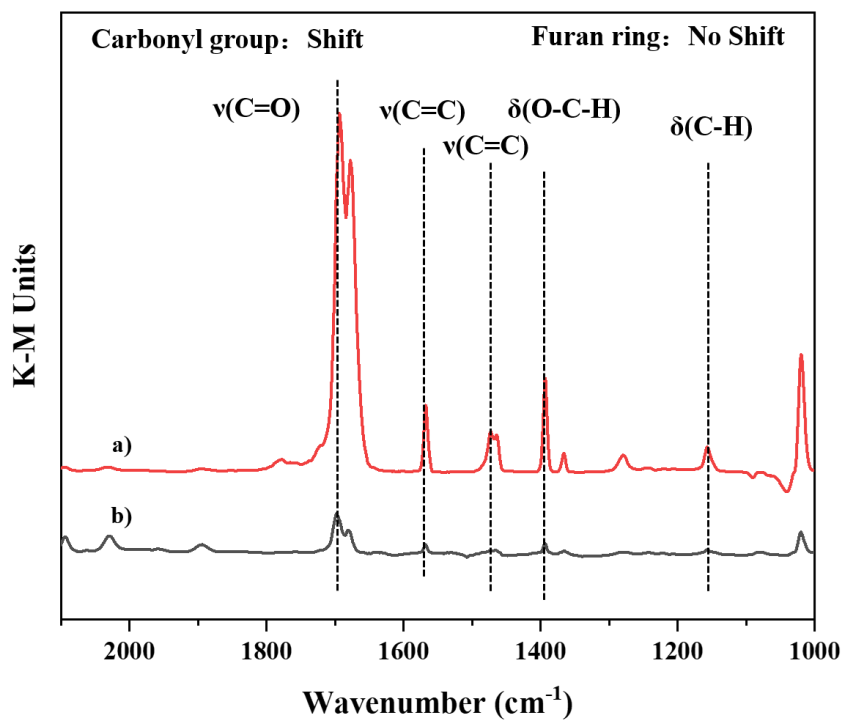

**Figure S14. Interaction of furfural with different supports, using *in situ* Drifts IR adsorption. a) HCP-OH and b) HCP-CH<sub>3</sub> after the Kubelka-Munk (K-M) transformation.**



## Furfural on HCP-CH<sub>3</sub>

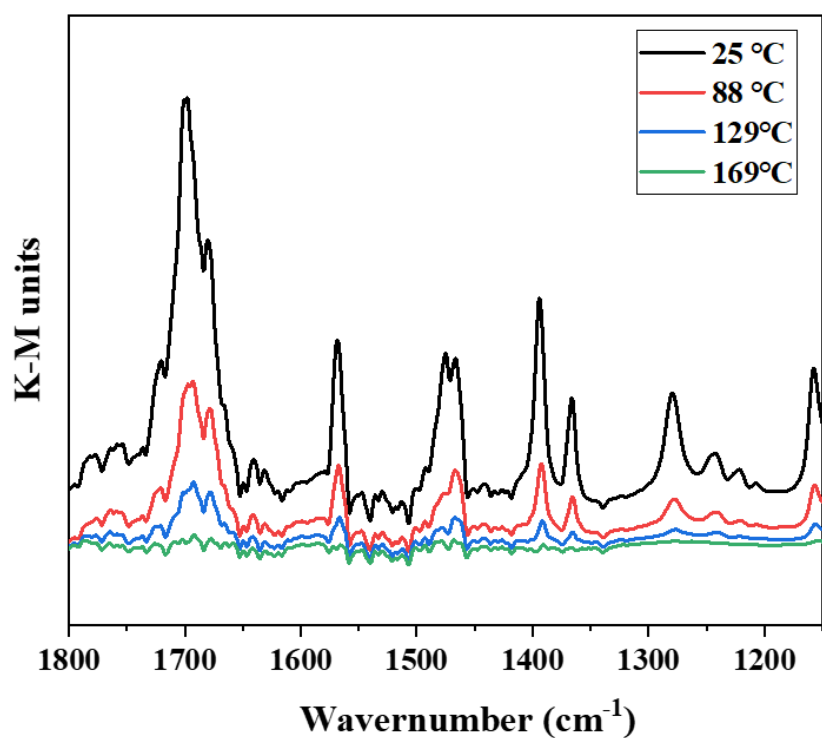

**Figure S15. Interaction of furfural with HCP-CH<sub>3</sub> via *in situ* Drifts-IR TPD experiments.** Results on HCP-CH<sub>3</sub> under different temperatures after the K-M transformation.

## Furfural on HCP-OH

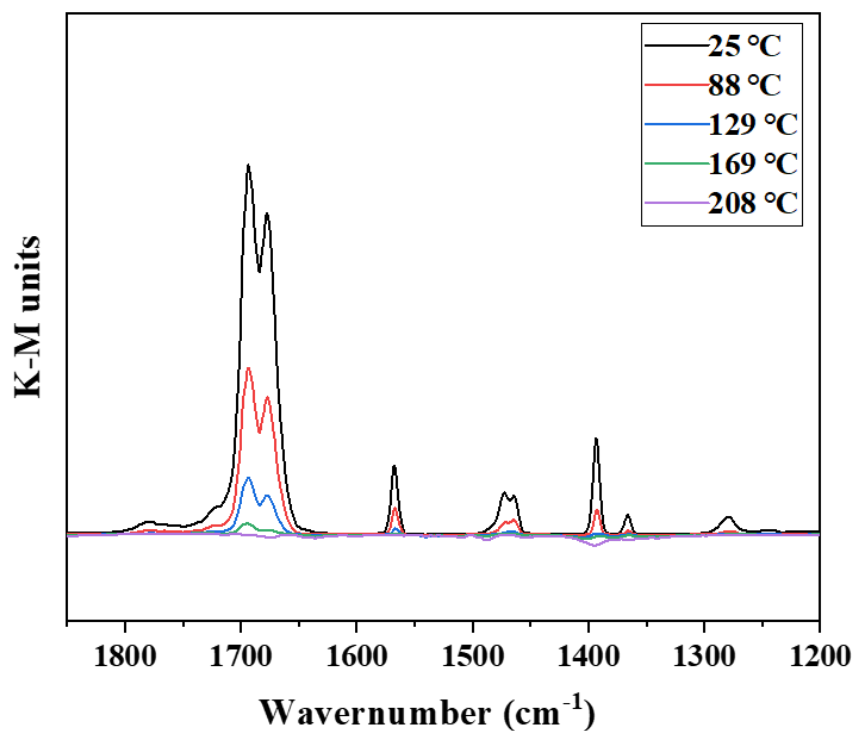

**Figure S16. Interaction of furfural with HCP-OH, using *in situ* Drifts-IR TPD experiments.** Drifts-IR of furfural on HCP-OH under different temperatures after the K-M transformation.

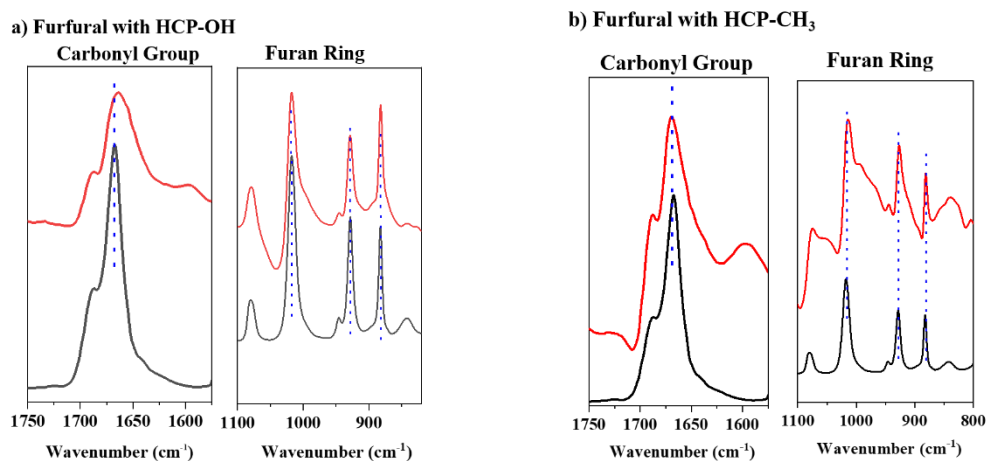

**Figure S17. Interaction of furfural with different supports, using ATR-IR adsorption.** a) HCP-OH and b) HCP-CH<sub>3</sub>. Black line refers to the pure liquid furfural and the red line to furfural adsorbed on catalyst. Peaks at 1670 cm<sup>-1</sup> are assigned to the carbonyl groups while those at 1018 cm<sup>-1</sup>, 931 cm<sup>-1</sup> and 886 cm<sup>-1</sup> to the furan ring.

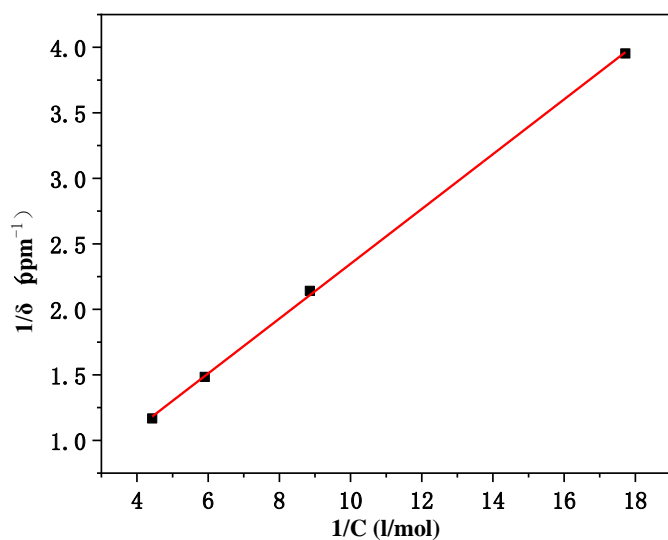

| ratio      | $\Delta\delta$ (ppm) | $\delta$ (ppm) |
|------------|----------------------|----------------|
| 0:1        |                      | 4.5579         |
| 1:1        | 0.253                | 4.8109         |
| 2:1        | 0.4671               | 5.025          |
| 3:1        | 0.6739               | 5.2318         |
| 4:1        | 0.8566               | 5.4145         |
| $\Delta G$ | -0.552 Kcal/mol      |                |

$$1/\Delta\delta = a \times 1/K \times 1/C + a \quad \text{equation S2}$$

$$\Delta G = -RT \ln(K) \quad \text{equation S3}$$

**Figure S18. Hydrogen bond measurement between furfural and phenol.** Linear relationship between  $1/\Delta\delta$  and  $1/C$  of furfural and phenol in  $\text{CDCl}_3$ , and chemical shift of active H in phenol with the addition of furfural.

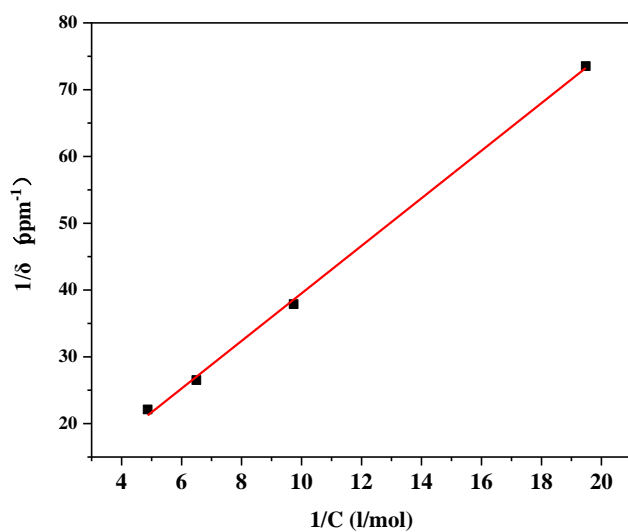

| Ratio      | $\Delta\delta$ (ppm) | $\delta$ (ppm) |
|------------|----------------------|----------------|
| 0:1        |                      | 4.5579         |
| 1:1        | 0.0136               | 4.5715         |
| 2:1        | 0.0264               | 4.5843         |
| 3:1        | 0.0377               | 4.5956         |
| 4:1        | 0.0452               | 4.6031         |
| $\Delta G$ | -0.213 Kcal/mol      |                |

$$1/\Delta\delta = a \times 1/K \times 1/C + a$$

equation S2

$$\Delta G = -RT \ln(K)$$

equation S3

**Figure S19. Hydrogen bond measurement between 2-MF and phenol.**

Linear relationship between  $1/\Delta\delta$  and  $1/C$  of 2-MF and phenol in  $CDCl_3$ , and chemical shift of active H in phenol with the addition of 2-MF.

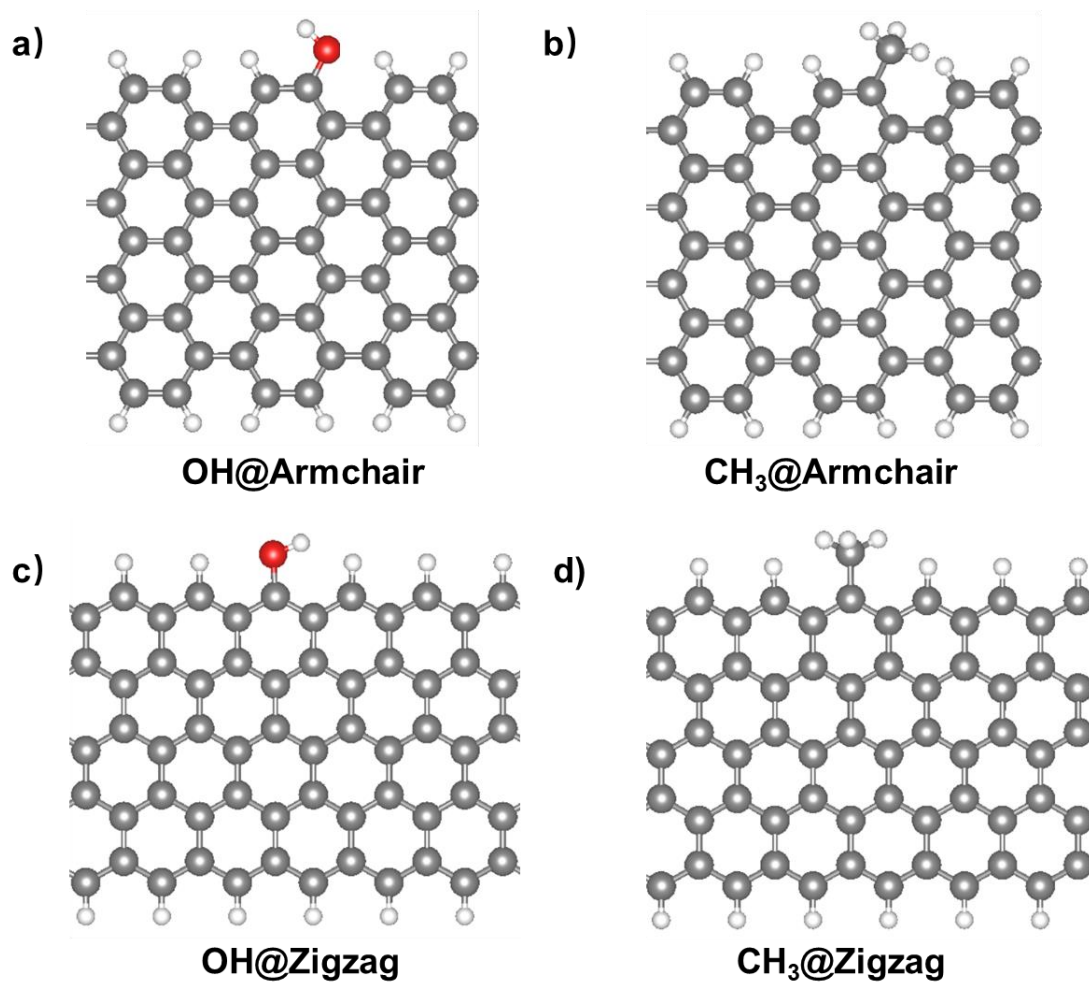

**Figure S20. Computational models.** (a) OH and (b) CH<sub>3</sub> on graphene ribbons with armchair edges; (c) OH and (d) CH<sub>3</sub> on graphene ribbons with zigzag edges.

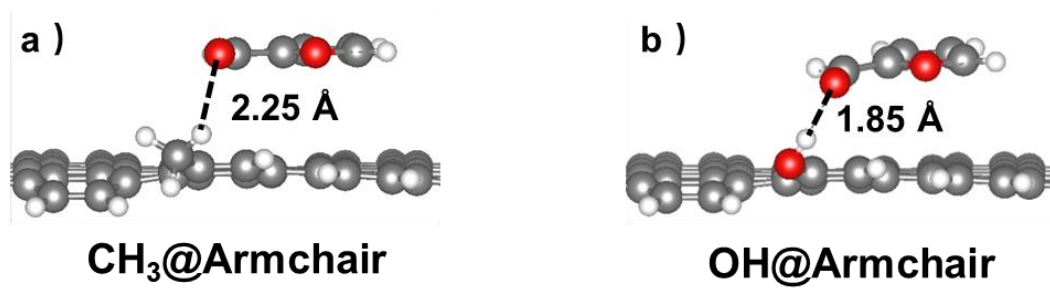

**Figure S21. Optimized configurations of furfural adsorption over (a)**

**CH<sub>3</sub> group and (b) OH group on armchair models.**

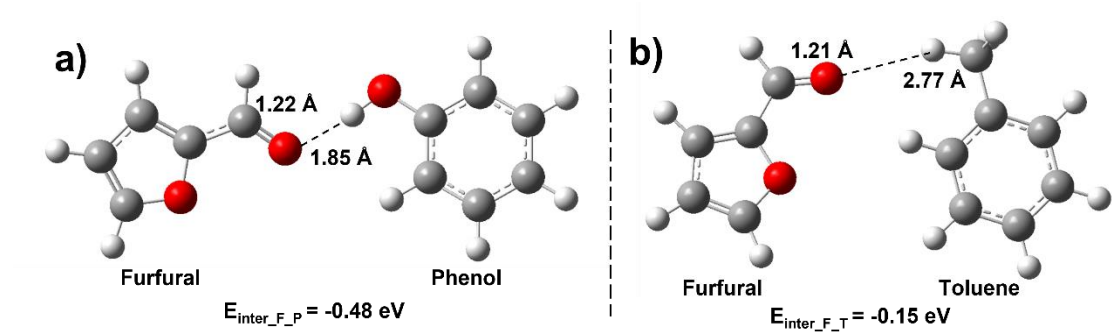

**Figure S22. Optimized configurations of the interaction between furfural and monomers. (a) Furfural and Phenol; (b) Furfural and Toluene.**



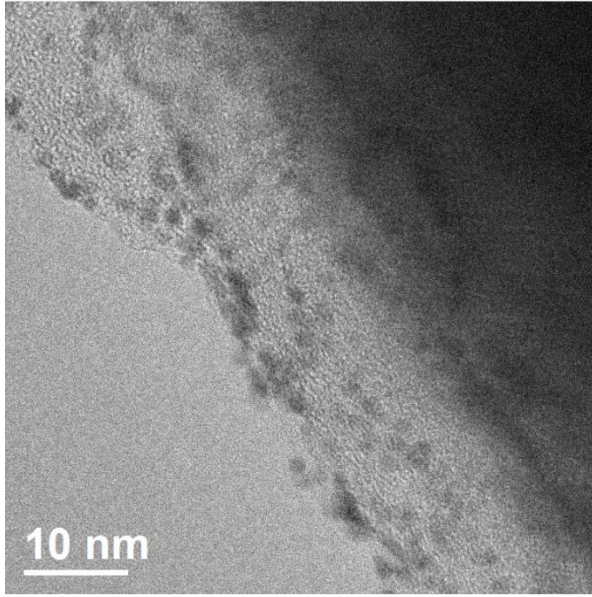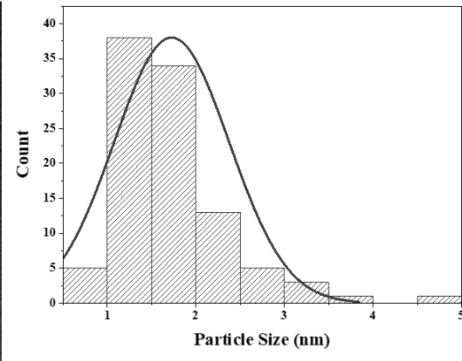

**$d_{\text{TEM}}=2.3 \text{ nm}$**   
**Loading: 0.2wt%**

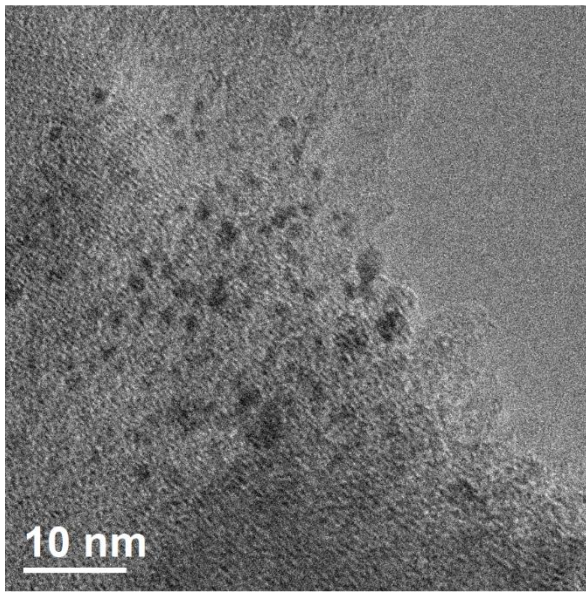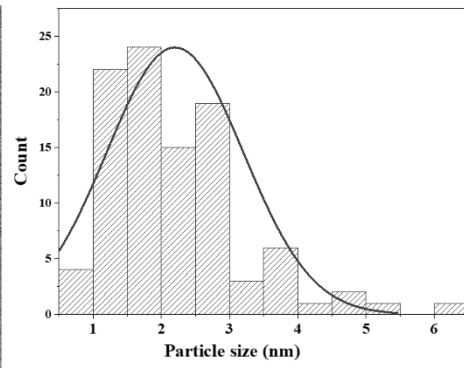

**$d_{\text{TEM}}=3.0 \text{ nm}$**   
**Loading: 0.5 wt%**

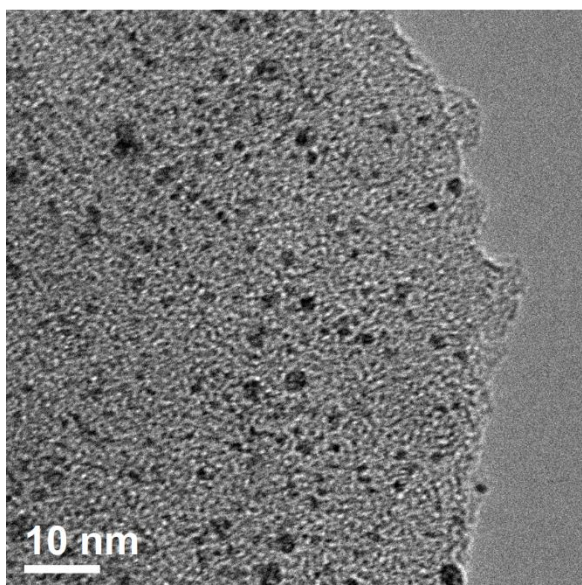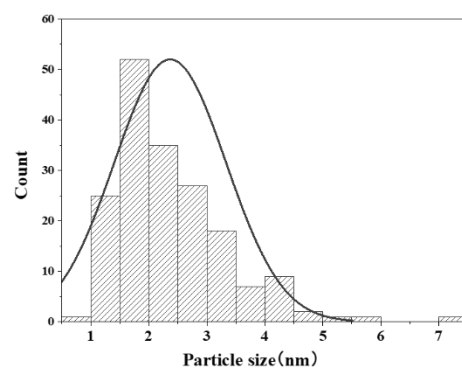

**$d_{\text{TEM}}=3.3$  nm**  
**Loading: 1 wt%**

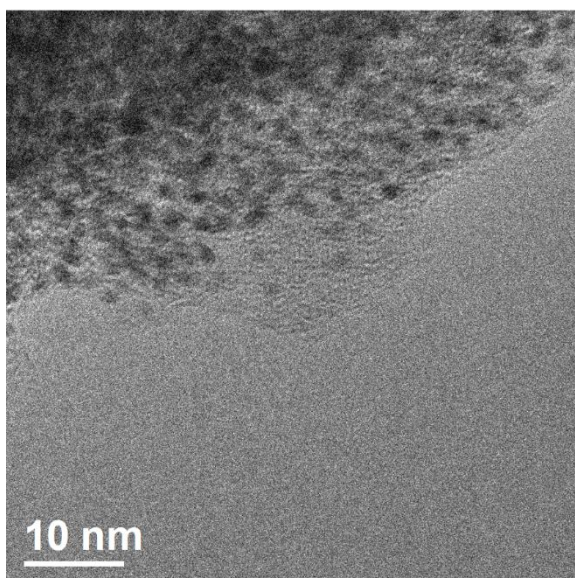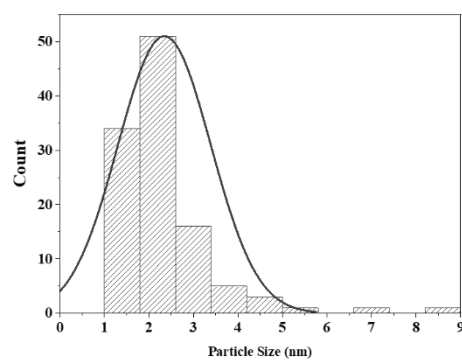

**$d_{\text{TEM}}=3.6$  nm**  
**Loading: 2 wt%**

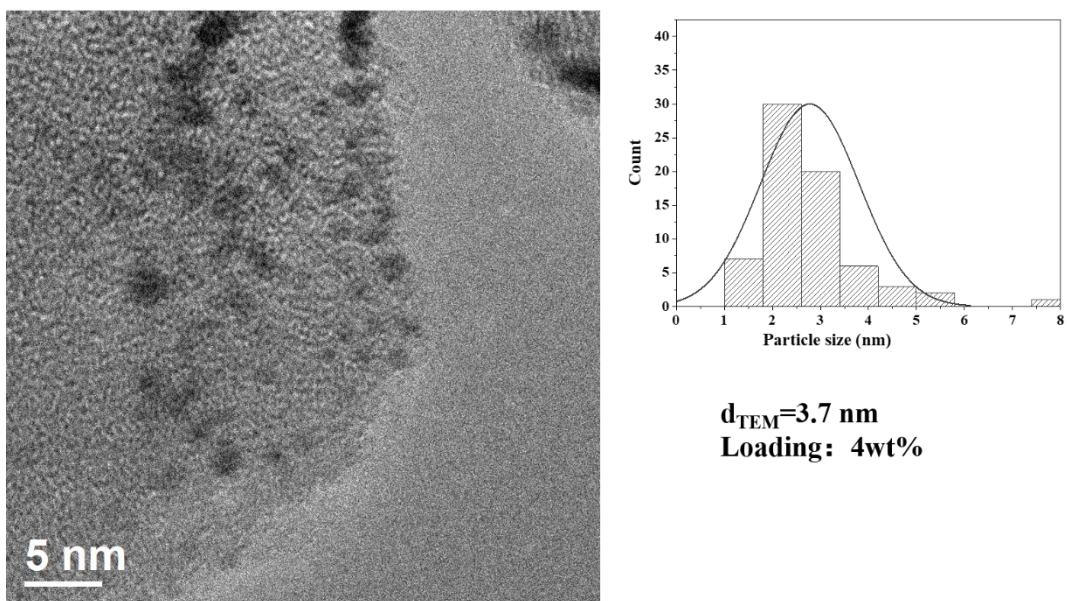

**Figure S23. Particle size.** TEM and particle size distribution of different Ir loading catalysts.

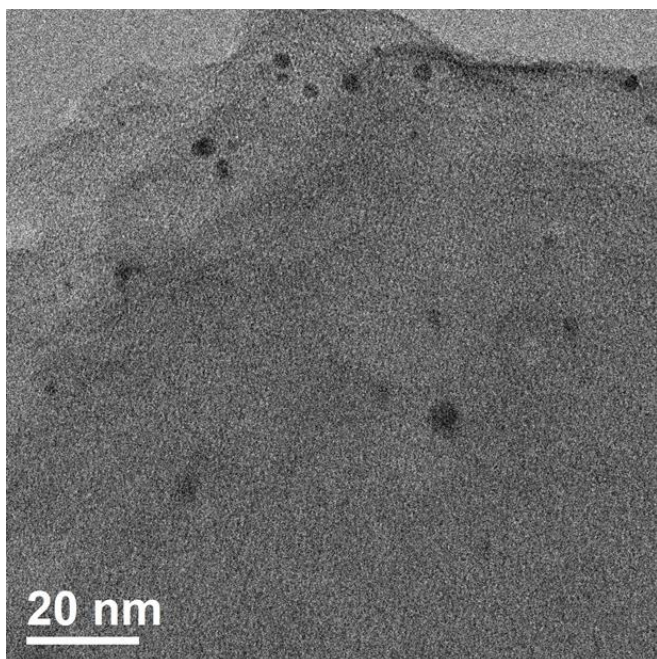

**Figure S24. Ir particles after reaction.** TEM images of Ir-HCP-OH after reaction.

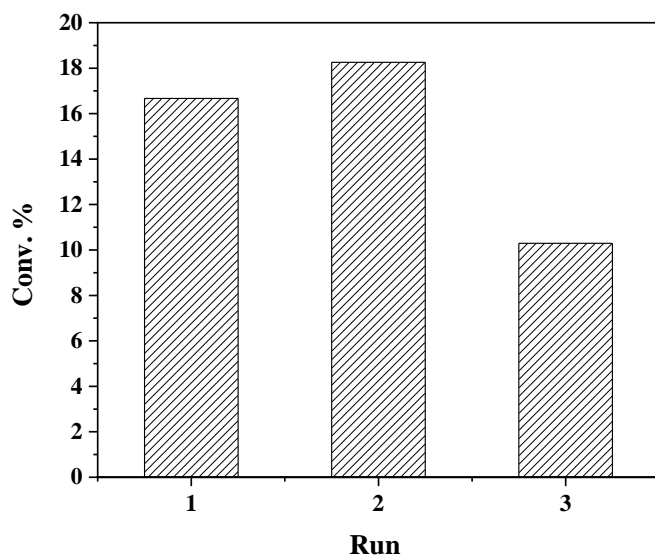

**Figure S25. Catalyst reusability of Ir-HCP-OH.**

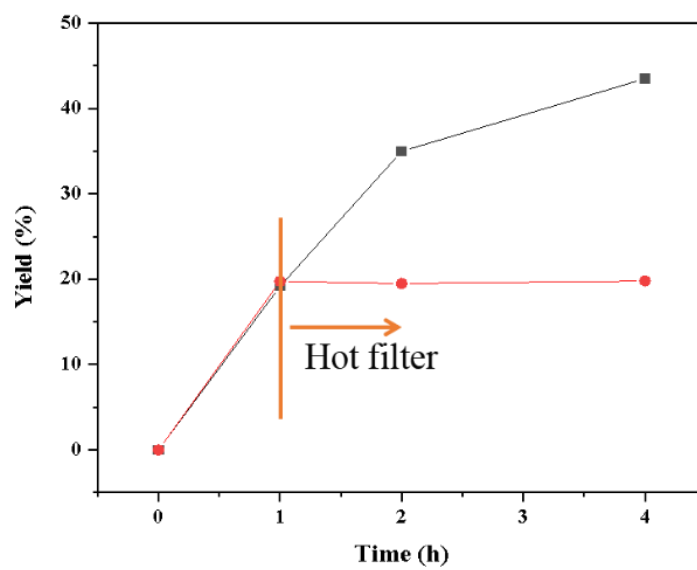

**Figure S26. Hot filter experiment of furfural hydrogen with Ir-HCP-**

**OH.**

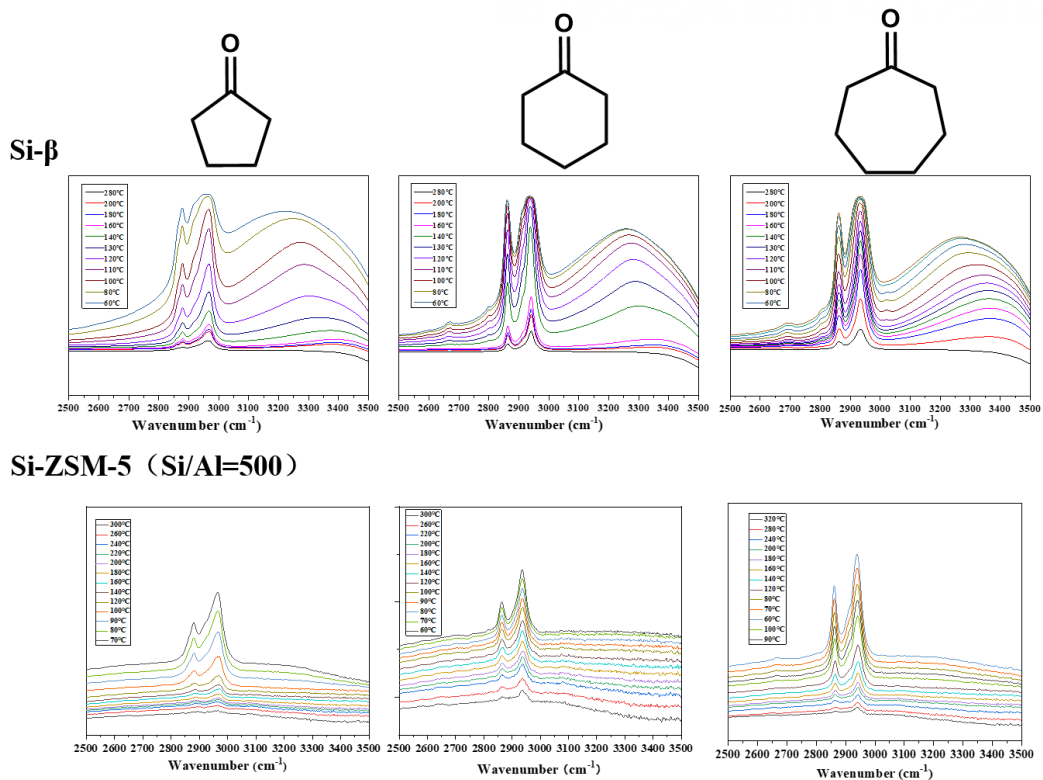

**Figure S27. Ketone adsorption difference over different zeolites. *In situ***

FT-IR of cyclopentanone, cyclohexanone, and cycloheptanone adsorption on Si-Beta and Si-ZSM-5 and corresponding TPD results.

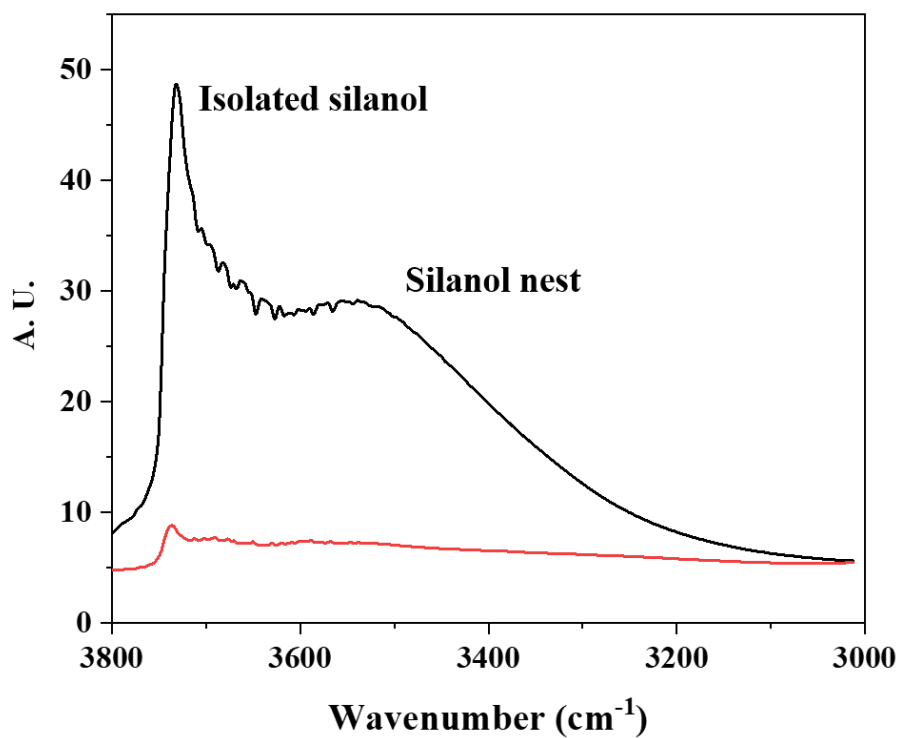

**Figure S28. Surface hydroxy difference of Si-Beta and Si-ZSM-5.**

Drifts-IR after K-M transformation. Peaks at 3780 cm<sup>-1</sup> assigned to isolated silanol and the broad peaks at 3500 cm<sup>-1</sup> to the silanol nests.

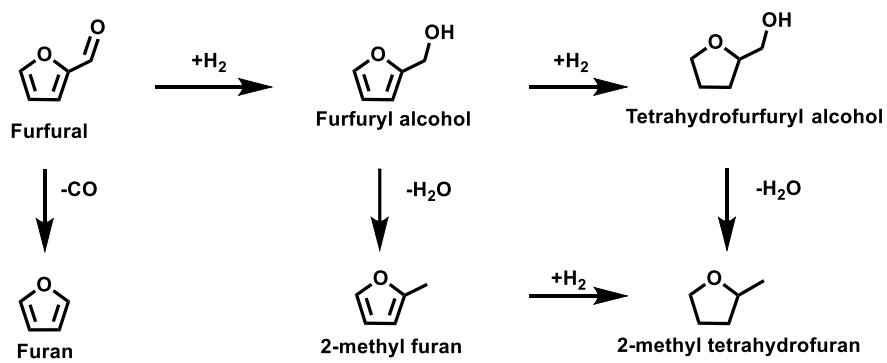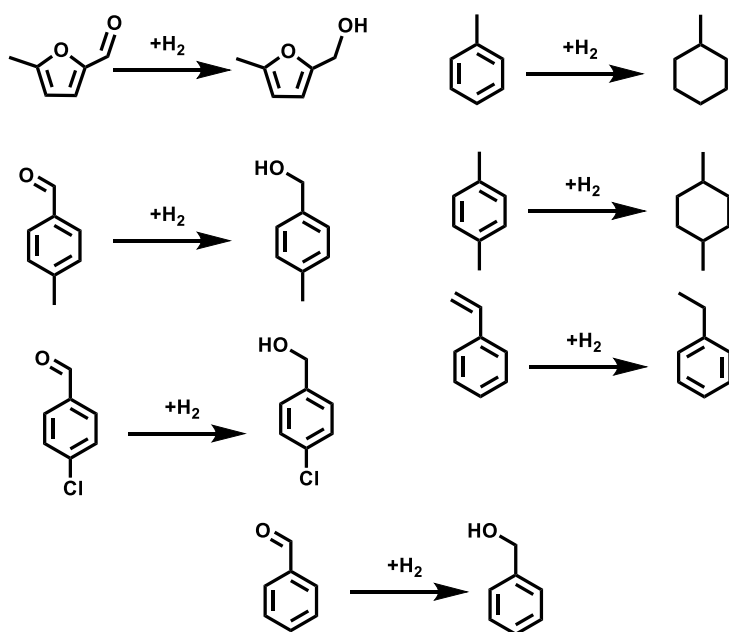

**Figure S29. Reaction networks for the reactions depicted in figures 2a, 2c, and 2d.**



**Table S1.** Textural properties of HCP, Ir-HCP, Si-Beta, and ZSM-5.

| Sample                 | $S_{BET}$ ( $m^2g^{-1}$ ) <sup>a</sup> | $D_{pore}$ (nm) <sup>b</sup> | $V_{pore}$ ( $cm^3g^{-1}$ ) <sup>c</sup> | N (wt%) <sup>d</sup> | C (wt%) <sup>d</sup> | H(wt%) <sup>d</sup> |
|------------------------|----------------------------------------|------------------------------|------------------------------------------|----------------------|----------------------|---------------------|
| HCP-CH <sub>3</sub>    | 720                                    | 2.8                          | 0.49                                     | 0.71                 | 76.33                | 6.76                |
| HCP-OH                 | 324                                    | 3.5                          | 0.29                                     | 0.70                 | 84.54                | 8.64                |
| Ir-HCP-CH <sub>3</sub> | 701                                    | 2.7                          | 0.47                                     | 0.72                 | 80.51                | 6.41                |
| Ir-HCP-OH              | 253                                    | 3.8                          | 0.24                                     | 0.77                 | 78.90                | 6.78                |
| Si-BETA                | 511                                    | 0.84                         | 0.24                                     | -                    | -                    | -                   |
| Si-ZSM-5               | 334                                    | 0.80                         | 0.15                                     | -                    | -                    | -                   |

<sup>a</sup> Calculated with the multipoint BET equation. <sup>b</sup> Pore width calculated with the NLDFT model. <sup>c</sup> Total pore volume calculated at  $P/P_0 = 0.99$ . <sup>d</sup> Determined by elemental analysis.

**Table S2.** Adsorption area of cyclopentanone, cyclohexanone, and cycloheptanone on Si-Beta and Si-ZSM-5.

|          | Area ( $cm^{-1}$ ) |                |                 | Comparable Area <sup>a</sup> |                |                 |
|----------|--------------------|----------------|-----------------|------------------------------|----------------|-----------------|
|          | Cyclo-pentanone    | Cyclo-hexanone | Cyclo-heptanone | Cyclo-pentanone              | Cyclo-hexanone | Cyclo-heptanone |
| Si-Beta  | 74.84              | 84.4           | 89.6            | 92.8                         | 84.4           | 166.7           |
| Si-ZSM-5 | 9.46               | 7.55           | 2.15            | 11.73                        | 7.55           | 3.99            |

a, comparable area calculate

cyclopentanone:cyclohexanone:cycloheptanone = 1.23: 1:1.86

**Table S3.** Adsorption energies ( $E_{\text{ads}}$ ) of furfural over OH group and  $\text{CH}_3$  group on the zigzag model and armchair model.

| $E_{\text{ads}}$ of furfural | Zigzag model | Armchair model |
|------------------------------|--------------|----------------|
| OH group                     | -0.40 eV     | -0.47 eV       |
| $\text{CH}_3$ group          | -0.33 eV     | -0.31 eV       |

**Table S4.** Comparison of recent works on furfural hydrogenation modulation.

| Entry | Catalyst                                                   | Active site   | Main products                                   | Method to modulate catalytic performance | Method           | Ref.      |
|-------|------------------------------------------------------------|---------------|-------------------------------------------------|------------------------------------------|------------------|-----------|
| 1     | OH functional HCPs supported Ir                            | Ir            | Furfural alcohol                                | Hydrogen bond interaction                | Experiment + DFT | This work |
| 2     | Organic modified Pd/TiO <sub>2</sub>                       | Pd            | Furfural alcohol                                | Surface active site modulation           | Experiment       | 1         |
| 3     | Co-impregnation of Pd and Ir on SiO <sub>2</sub>           | Ir,Pd         | Furfural alcohol and tetrahydrofurfuryl alcohol | Metal alloy method                       | Experiment       | 2         |
| 4     | Pt(111), stepped Pt(211), and Pt55 cluster                 | Pt            | Furfural alcohol and furan                      | Particle size                            | DFT              | 3         |
| 5     | sol-immobilization Pd/TiO <sub>2</sub>                     | Pd            | Furfural alcohol and tetrahydrofurfuryl alcohol | Particle size and active site            | Experiment + DFT | 4         |
| 6     | $\alpha$ -MoC                                              | $\alpha$ -MoC | Methyl furan                                    | Solvent                                  | Experiment + DFT | 5         |
| 7     | Phosphoric acid modified Pt/Al <sub>2</sub> O <sub>3</sub> | Pt            | Methyl furan                                    | Interfacial Metal-acid site              | Experiment       | 6         |
| 8     | Pd(111)                                                    | Pd            | Furfuryl alcohol or furan                       | Hydrogen-coverage                        | DFT              | 7         |

## Supplementary Note 1

In order to test the universality of the H bond in other materials except the special designed POPs, we tested the adsorption of ketones on Si- Beta and Si-ZSM-5 using *in-situ* FT-IR (Figure S27). Three different ketones with different molecule size including cyclopentanone, cyclohexanone, and cycloheptanone were tested. Irrespective of the substrate, Si-Beta adsorbs almost 10× than Si-ZSM-5 (Table S2). Although the two zeolites differ in BET surface area, pore volume, and pore size (Table S1), these little differences cannot explain such a huge adsorption difference. DRIFTS-IR reveals a huge difference in the area around 3500  $\text{cm}^{-1}$  (Figure S28), ascribed to Si-OH groups, implying many more OH groups in Si-Beta than Si-ZSM-5 that can hydrogen bond with the carbonyl groups. which can form the hydrogen bond between the carbonyl groups and the Si-OH. It is highly believed that this is the main reason for the huge adsorption difference. This experiment demonstrated weak interaction like H bond might widely existed in during the

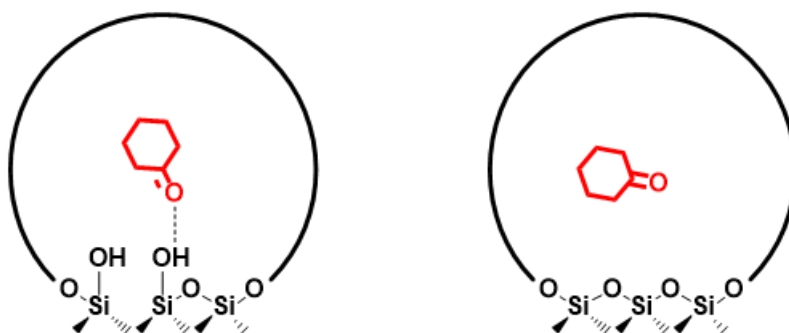

**Illustration of hydrogen bond formed between ketone and Si-OH in zeolite pores.**

### Supplementary References

1. Pang SH, Schoenbaum CA, Schwartz DK, Medlin JW. Effects of Thiol Modifiers on the Kinetics of Furfural Hydrogenation over Pd Catalysts. *ACS Catalysis* 4, 3123-3131 (2014).
2. Nakagawa Y, Takada K, Tamura M, Tomishige K. Total Hydrogenation of Furfural and 5-Hydroxymethylfurfural over Supported Pd-Ir Alloy Catalyst. *ACS Catalysis* 4, 2718-2726 (2014).
3. Cai Q-X, Wang J-G, Wang Y-G, Mei D. Mechanistic insights into the structure-dependent selectivity of catalytic furfural conversion on platinum catalysts. *AIChE Journal* 61, 3812-3824 (2015).
4. Rogers SM, et al. Tandem Site- and Size-Controlled Pd Nanoparticles for the Directed Hydrogenation of Furfural. *ACS Catalysis* 7, 2266-2274 (2017).
5. Deng Y, et al. Solvent Tunes the Selectivity of Hydrogenation Reaction over  $\alpha$ -MoC Catalyst. *Journal of the American Chemical Society* 140, 14481-14489 (2018).
6. Zhang J, et al. Control of interfacial acid-metal catalysis with organic monolayers. *Nature Catalysis* 1, 148-155 (2018).
7. Wang S, Vorotnikov V, Vlachos DG. Coverage-Induced Conformational Effects on Activity and Selectivity: Hydrogenation and Decarbonylation of Furfural on Pd(111). *ACS Catalysis* 5, 104-112 (2015).
